# Supplementary material for: Immunization expands B cells specific to HIV-1 V3 glycan in mice and macaques
Source: Springer Nature journal article supplement (doi:10.1038/s41586-019-1250-z), 2019-05-29
Supplement: MOESM4 [file 41586_2019_1250_MOESM4_ESM.xlsx]

## Sheet: Sheet2
		NHP 1							NHP 5							NHP 6							NHP 8
		VH	DH	JH	CDRH3	LENGTH (AA)	Nt mut.		VH	DH	JH	CDRH3	LENGTH (AA)	Nt mut.		VH	DH	JH	CDRH3	LENGTH (AA)	Nt mut.		VH	DH	JH	CDRH3	LENGTH (AA)	Nt mut.
		IGHV4_11*S4129	IGHD4-1*01	IGHJ4*01	ARVVNYGPLDY	11	3		IGHV3_3F*F132	IGHD3-2*01	IGHJ1*01	ARDKGSSYYQPEYFEF	16	9		IGHV3_45*S5257	IGHD3-1*01	IGHJ5-1*01	ARGITRMITVTKTNWFDV	18	4		IGHV5_1F*F134	IGHD3-4*01	IGHJ4*01	AKDAYYDYDISSRYYYFDY	19	3
		IGHV4_11*S4129	IGHD3-2*01	IGHJ4*01	ARVVKNGPLDY	11	6		IGHV3_3F*F132	IGHD3-2*01	IGHJ1*01	ARDKGSSYYQPEYFEF	16	10		IGHV3_45*S5257	IGHD3-1*01	IGHJ5-1*01	ARGITRMITVTKTNWFDV	18	1		IGHV5_1F*F134	IGHD3-4*01	IGHJ4*01	AKDAYYDYDISSRYYYFDY	19	3
		IGHV4_11*S4129	IGHD3-1*01	IGHJ4*01	ARVVKYGPLDY	11	3		IGHV3_3F*F132	IGHD3-2*01	IGHJ1*01	VRDKGSSYYQPEYFEF	16	7		IGHV3_45*S5257	IGHD3-1*01	IGHJ5-1*01	ARGITRMITVTKTNWFDV	18	1		IGHV5_1F*F134	IGHD3-4*01	IGHJ4*01	AKDAYYDNDISTRYYYFDY	19	3
		IGHV4_11*S4129	IGHD3-1*01	IGHJ4*01	ARLVRYGPLDY	11	7									IGHV3_45*S5257	IGHD3-1*01	IGHJ5-1*01	ARGITRMITVTKTNWFDV	18	6
		IGHV4_11*S4129	IGHD3-1*01	IGHJ4*01	ARIVKYGPLDF	11	6		IGHV4_1M*F130	IGHD6-3*01	IGHJ4*01	ARTGKAAPVDY	11	11									IGHV7_1A*F124	IGHD1-2*01	IGHJ4*01	ARLGEYSWNSIGYFDY	16	3
		IGHV4_11*S4129	IGHD3-1*01	IGHJ4*01	ARVVKYGPLDY	11	4		IGHV4_1M*F130	IGHD6-3*01	IGHJ4*01	ARTGKAAPVDY	11	11		IGHV4_11*S5305	IGHD6-5*01	IGHJ4*01	ARLAVAGPFDY	11	5		IGHV7_1A*F124	IGHD1-2*01	IGHJ4*01	ARLGEYSWNSIGYFDY	16	4
		IGHV4_11*S4129	IGHD3-1*01	IGHJ4*01	ARVVKYGPLDY	11	2		IGHV4_1M*F130	IGHD6-3*01	IGHJ4*01	ARTGKAAPVDC	11	7		IGHV4_11*S5305	IGHD6-5*01	IGHJ4*01	ARLGVAGPLDY	11	2		IGHV7_1A*F124	IGHD1-2*01	IGHJ4*01	SRLGDYSWNQIGYFDY	16	3
		IGHV4_11*S0762	IGHD1-2*01	IGHJ4*01	ARGSRIAPFDY	11	7		IGHV5_1C*F130	IGHD3-2*01	IGHJ4*01	AKGGDNYYDSGYYDDY	16	0		IGHV1_2B*F134	IGHD1-8*01	IGHJ4*01	ATYKTIDY	8	3		IGHV4_6G*F124	IGHD6-3*01	IGHJ4*01	AINSGSWNYYFDY	13	11
		IGHV4_11*S0762	IGHD1-2*01	IGHJ4*01	ARGSRIAPFDY	11	5									IGHV1_2B*F134	IGHD2-3*01	IGHJ4*01	ASYKNIDY	8	1		IGHV4_6G*F124	IGHD6-3*01	IGHJ4*01	AINSGSWNYYFDY	13	14
		IGHV4_11*S0762	IGHD1-2*01	IGHJ4*01	ARGSRIAPFDH	11	7		IGHV4_3N*F133	IGHD3-3*01	IGHJ4*01	ARNRGWGDLVFDY	13	3
		IGHV4_11*S0762	IGHD1-2*01	IGHJ4*01	ARGSRIAPFDY	11	9									IGHV4_11*S9280	IGHD4-1*01	IGHJ4*01	ARDRHGIPFDY	11	2		IGHV3_45*S4957	IGHD4-4*01	IGHJ5-2*02	ARDGEYGNPGDV	12	3
									IGHV5_1H*F132	IGHD6-1*01	IGHJ4*01	AKVLSGWFWDYFDY	14	8									IGHV3_45*S4957	IGHD4-4*01	IGHJ5-2*02	ARDGEYGNPGDV	12	5
		IGHV4_11*S4129	IGHD3-3*01	IGHJ4*01	SRYQARGPIDS	11	3									IGHV1_2B*F134	IGHD3-3*01	IGHJ4*01	ARSRGYWGDLFDF	13	0
		IGHV4_11*S4129	IGHD3-3*01	IGHJ4*01	ARDQARGPIDY	11	4		IGHV4_11*S4664	IGHD6-5*01	IGHJ4*01	ARLAVAGPVDY	11	5									IGHV5_1F*F134		IGHJ5-1*01	AKGRGYNRFDV	11	3
		IGHV4_11*S4129	IGHD3-3*01	IGHJ4*01	ARNQARGPIDY	11	27									IGHV3_45*S5348	IGHD3-3*01	IGHJ4*01	ARLSGWGDFRIDY	13	2		IGHV5_1F*F134	IGHD3-3*01	IGHJ5-1*01	AKGRGVNRFDV	11	4
		IGHV4_11*S4129	IGHD3-3*01	IGHJ4*01	ARDQARGPIDY	11	9		IGHV3_3F*F132	IGHD6-1*01	IGHJ6*01	ARGSSGWYGSGLDS	14	7
																IGHV1_53*S2078	IGHD2-1*01	IGHJ5-1*01	ATGIWFDV	8	4		IGHV7_1A*F124	IGHD1-8*01	IGHJ5-1*01	AGGRSLDA	8	0
		IGHV4_2C*F124	IGHD1-3*01	IGHJ4*01	ARDNRIGPFDY	11	6		IGHV4_1U*F130	IGHD1-1*01	IGHJ5-1*01	ARDHIESWNKVNWFDV	16	7									IGHV7_1A*F124	IGHD1-8*01	IGHJ5-1*01	AGGRSLDA	8	3
		IGHV4_2C*F124	IGHD1-3*01	IGHJ4*01	ARDNRIGPFDY	11	6									IGHV3_45*S5257	IGHD2-3*01	IGHJ4*01	ARANNGGYFDY	11	6
		IGHV4_2C*F124	IGHD1-3*01	IGHJ4*01	ARDNRIGPFDY	11	4		IGHV1_1G*F133	IGHD6-3*01	IGHJ1*01	ATYSGSWYAEYFEF	14	1									IGHV3_45*S4957	IGHD3-4*01	IGHJ5-1*01	VRLGDYNIWTGDNRFDV	17	5
		IGHV4_2C*F124	IGHD2-1*01	IGHJ4*01	ARDKRIGPFDY	11	6									IGHV1_2B*F134	IGHD4-1*01	IGHJ2*01	ARMTTVAAFGGYFDL	15	5		IGHV3_45*S4957	IGHD4-4*01	IGHJ5-1*01	ARVGEYNIWTGDNRFDV	17	5
									IGHV5_1F*F134	IGHD2-3*01	IGHJ4*01	AKQEDYNFWSSYFLPDY	17	1
		IGHV3_4I*F130	IGHD6-3*01	IGHJ4*01	AKKRRQLENDY	11	4									IGHV7_1A*F124	IGHD1-8*01	IGHJ4*01	ASGGNYADY	9	1		IGHV7_1A*F124	IGHD6-2*01	IGHJ5-2*02	VRQGYSSWYNSLDV	14	4
		IGHV3_4I*F130	IGHD6-3*01	IGHJ4*01	VKKRRQLENDY	11	4		IGHV1_1G*F133	IGHD6-1*01	IGHJ4*01	ARDSSGWYEGFDY	13	1									IGHV7_1A*F124	IGHD6-2*01	IGHJ5-2*02	VRQGYSSWYNSLDV	14	8
		IGHV3_4I*F130	IGHD6-3*01	IGHJ4*01	AKKRRQLENDY	11	6									IGHV4_11*S4664	IGHD6-3*01	IGHJ4*01	ARRLSRRYFDY	11	0
		IGHV3_4I*F130	IGHD6-3*01	IGHJ4*01	VKKRRQLENDY	11	4		IGHV1_53*S2078	IGHD3-1*01	IGHJ4*01	ATGRYYGPSWAIFDY	15	3									IGHV3_1P*F130	IGHD6-2*01	IGHJ5-2*02	SRGGIAAGRGSSLDV	15	5
																IGHV3_2L*F132	IGHD2-4*01	IGHJ4*01	TREFCSGIYCYAPFDY	16	0		IGHV3_1P*F130	IGHD6-2*01	IGHJ5-2*02	TRGGIASGRGSSLDV	15	8
		IGHV4_11*S4664	IGHD6-2*01	IGHJ4*01	ASRIAGGPFDY	11	4		IGHV4_11*S4290	IGHD1-8*01	IGHJ4*01	ARDGNFGPIDY	11	4
		IGHV4_11*S4664	IGHD6-2*01	IGHJ4*01	ASRIAGGPFDF	11	8									IGHV1_2B*F134	IGHD3-4*01	IGHJ5-2*02	ASFKTLDV	8	3		IGHV3_3F*F132	IGHD6-3*01	IGHJ4*01	ARGGYYSGRVFDDY	14	15
		IGHV4_11*S4664	IGHD6-2*01	IGHJ4*01	ASLIAAGPFDY	11	8		IGHV7_1A*F124		IGHJ5-1*01	ASGPNWFDV	9	7									IGHV3_3F*F132	IGHD1-8*01	IGHJ4*01	ARGGYYSGRVFDDY	14	10
		IGHV4_11*S4664	IGHD1-3*01	IGHJ4*01	ASRIRGGPFDY	11	0									IGHV5_1F*F134	IGHD5-1*01	IGHJ4*01	AKGVGGFSYSYPHY	14	8
									IGHV5_1C*F130	IGHD2-5*01	IGHJ4*01	AKSETDFWTSYYFNY	15	8									IGHV4_3I*F132	IGHD3-3*01	IGHJ5-2*02	ARHSGWGDPYLDV	13	2
		IGHV4_3M*F133	IGHD4-2*01	IGHJ4*01	ARDIVVGPIDY	11	7									IGHV3_45*S5257	IGHD3-4*01	IGHJ4*01	ARDGHYNFWSPPGY	14	5		IGHV4_3I*F132	IGHD3-3*01	IGHJ5-2*02	ARHSGWGDPYLDV	13	2
		IGHV4_3M*F133	IGHD2-5*01	IGHJ4*01	ARDIVIGPIDY	11	11		IGHV4_2M*F130	IGHD2-5*01	IGHJ5-1*01	ARDICSGSGCYWYRDNWFDV	20	1
		IGHV4_3M*F133	IGHD2-5*01	IGHJ4*01	ARDIVIGPIDY	11	6									IGHV4_11*S9724	IGHD3-1*01	IGHJ5-1*01	ARAEDEDDYGSFDV	14	6		IGHV3_4J*F132	IGHD5-2*01	IGHJ4*01	ARDMRDIAAGGYTYGYFDY	19	18
									IGHV4_1T*F130	IGHD2-1*01	IGHJ4*01	ASNRRIAPLDY	11	6									IGHV3_4J*F132	IGHD5-2*01	IGHJ4*01	ARDRRDIAAGGYSYGYFDY	19	18
		IGHV4_11*S4129	IGHD6-1*01	IGHJ4*01	ATVGRLAPFDY	11	5									IGHV4_11*S5305	IGHD6-1*01	IGHJ3*01	ARLGSSGWYRDDAFDF	16	3
		IGHV4_11*S4129	IGHD2-2*01	IGHJ4*01	ARVGRVVPFDY	11	5		IGHV7_1A*F124	IGHD3-1*01	IGHJ4*01	ASGRYYFDY	9	5									IGHV5_1F*F134	IGHD2-3*01	IGHJ4*01	AKGGENIFDY	10	3
		IGHV4_11*S4129	IGHD6-5*01	IGHJ4*01	ARVGRVAPFDY	11	6									IGHV3_1C*F124	IGHD6-5*01	IGHJ4*01	AKPRGRWLEDY	11	7
									IGHV3_3F*F132	IGHD4-3*01	IGHJ1*01	ARDRTVTPNRGYFEF	15	8									IGHV7_1A*F124	IGHD1-8*01	IGHJ4*01	ATYKNYFDY	9	3
		IGHV3_2N*F134	IGHD6-6*01	IGHJ1*01	AKSPWGQSSSFEYFEF	16	4									IGHV3_1V*F124	IGHD4-4*01	IGHJ4*01	TRPRQYSTGDY	11	0
		IGHV3_2N*F134	IGHD6-6*01	IGHJ1*01	AKSPWGQSTSFEYFEF	16	5		IGHV1_2B*F134	IGHD6-5*01	IGHJ6*01	ARDGPYSGGWSELDS	15	1									IGHV3_1T*F132	IGHD2-2*01	IGHJ4*01	TGEGWVNYAPVDY	13	4
		IGHV3_2N*F134	IGHD4-1*01	IGHJ1*01	AKSPWGQSSYFEYFEF	16	3									IGHV3_1C*F124	IGHD4-4*01	IGHJ4*01	AKMGGRGYSSYGPVFDY	17	2
									IGHV4_5F*F132	IGHD6-3*01	IGHJ4*01	ARWEYSGNWGLDY	13	22									IGHV1_1P*F133	IGHD3-2*01	IGHJ1*01	VVRGMVVVTEYFEF	14	3
		IGHV3_45*S5348	IGHD1-8*01	IGHJ5-2*02	ASVLWGLPQDDNSLDV	16	6									IGHV4_11*S4129	IGHD1-8*01	IGHJ4*01	ARIVTRGPFDY	11	3
		IGHV3_45*S5348	IGHD1-8*01	IGHJ5-2*02	ASVLWEVPQDDNSLDV	16	3		IGHV4_11*S5305	IGHD6-2*01	IGHJ3*01	ARSTSSWPRTSDAFDF	16	1									IGHV7_1A*F124	IGHD6-2*01	IGHJ4*01	ARGSNWMWVADY	12	1
		IGHV3_45*S5348	IGHD1-8*01	IGHJ5-2*02	ANVLWGLPQDDNSLDV	16	2									IGHV3_45*S5257	IGHD3-3*01	IGHJ5-1*01	ARDVTTRVVIIDHRFDV	17	1
									IGHV3_4I*F130	IGHD6-2*01	IGHJ4*01	AKKRSSWSRIDY	12	1									IGHV7_A*F132	IGHD6-3*01	IGHJ5-2*02	ARSPYSGSWDNSLDV	15	0
		IGHV4_2C*F124	IGHD6-1*01	IGHJ4*01	ASLQRLGPIDY	11	6									IGHV7_1A*F124	IGHD6-1*01	IGHJ5-1*01	ARQLGGGQTDRFDV	14	3
		IGHV4_2C*F124	IGHD6-1*01	IGHJ4*01	ASLQRLGPIDY	11	4		IGHV3_3F*F132	IGHD6-1*01	IGHJ4*01	ARDGSGWRRVTFDY	14	10									IGHV3_3F*F132	IGHD4-1*01	IGHJ5-2*02	ARATLATVATTTWYNSLDV	19	14
		IGHV4_2C*F124	IGHD6-1*01	IGHJ4*01	ASLQRLGPIDY	11	2									IGHV7_1A*F124	IGHD4-4*01	IGHJ4*01	ARQAYSNYPDY	11	3
									IGHV7_1A*F124	IGHD6-1*01	IGHJ4*01	ATGRNYFDY	9	4									IGHV3_1T*F132	IGHD6-3*01	IGHJ4*01	IIGPMAGALDY	11	2
		IGHV4_11*S4129	IGHD3-4*01	IGHJ1*01	ASLQYFGPFEF	11	0									IGHV3_4I*F130	IGHD1-8*01	IGHJ4*01	VKLREKWETRGD	12	4
		IGHV4_11*S4129	IGHD3-4*01	IGHJ1*01	ASLQYFGPFDF	11	5		IGHV3_4I*F130	IGHD4-4*01	IGHJ4*01	AKTGAVTTGFDY	12	4									IGHV3_3F*F132	IGHD6-2*01	IGHJ5-1*01	VRDPSITPGPSYNRFDV	17	10
																IGHV5_1F*F134	IGHD4-1*01	IGHJ5-1*01	AKSYGSMSNRFDV	13	3
		IGHV4_11*S4129	IGHD6-1*01	IGHJ4*01	ARAERAGPFDY	11	10		IGHV4_11*S0762	IGHD3-2*01	IGHJ4*01	ARLVGGSGYYYIGD	14	0									IGHV3_1S*F130	IGHD2-5*01	IGHJ5-2*02	TVFCTGSDCYSLDV	14	4
		IGHV4_11*S4129	IGHD6-1*01	IGHJ4*01	ARAERAGPFDY	11	5									IGHV4_11*S4664	IGHD3-2*01	IGHJ4*01	ARVIRLGPFDY	11	2
									IGHV3_1B*F124	IGHD6-2*01	IGHJ4*01	AKVPYSSWSHFDY	13	6									IGHV5_1F*F134	IGHD6-3*01	IGHJ4*01	AKDRGRGGSWSLGNDY	16	2
		IGHV3_45*S5348	IGHD1-1*01	IGHJ4*01	ARHPHLESFDY	11	4									IGHV4_11*S4129	IGHD3-1*01	IGHJ5-1*01	ARETFEGDDYGYYYTPDNWFDV	22	3
		IGHV3_45*S5348	IGHD1-1*01	IGHJ4*01	ARHPHLESFDY	11	2		IGHV3_2M*F132	IGHD6-1*01	IGHJ4*01	TSPRMRYSSGSFDY	14	3									IGHV3_1S*F130	IGHD2-3*01	IGHJ4*01	TREGYCSSNYCSV	13	2
																IGHV3_2P*F133	IGHD6-3*01	IGHJ4*01	AKSGNSGSWNYFDY	14	9
		IGHV4_11*S4129	IGHD4-3*01	IGHJ1*01	ARNYGNYGYFEF	12	5		IGHV1_2B*F134	IGHD4-2*01	IGHJ4*01	ARVRGYSGYSFFDY	14	0									IGHV3_1T*F132		IGHJ4*01	TTGNYYFDY	9	3
		IGHV4_11*S4129	IGHD4-3*01	IGHJ1*01	ARNYGNYGYFEF	12	2									IGHV3_45*S5348	IGHD3-3*01	IGHJ4*01	ARRRGWGDPYFDY	13	1
									IGHV3_4S*F133	IGHD6-2*01	IGHJ5-1*01	SRGSTWSGDWFDV	13	7									IGHV5_1F*F134	IGHD1-8*01	IGHJ4*01	AKVGGSYRGWYFDY	14	0
		IGHV1_53*S2078	IGHD3-3*01	IGHJ1*01	ATGPYWGDYYGRYFEL	16	2									IGHV1_53*S2078	IGHD3-1*01	IGHJ1*01	ATGFSMITVALFDF	14	1
		IGHV1_53*S2078	IGHD3-3*01	IGHJ1*01	ATGPYWGDYYGRYFEF	16	2		IGHV3_3O*F130	IGHD4-4*01	IGHJ5-1*01	TKRLAYSNPYNRFDV	15	2									IGHV5_1F*F134	IGHD2-4*01	IGHJ5-1*01	AKDGGPSGSYYYGGRFDV	18	14
																IGHV4_11*S4359	IGHD3-1*01	IGHJ4*01	ASQGYEDDYAYWAFKFDY	18	1
		IGHV4_11*S4129	IGHD6-3*01	IGHJ4*01	ATERRAGPVDY	11	4		IGHV3_2W*F134	IGHD3-2*01	IGHJ4*01	ARGGVGLDDVTYYYSGSYYYHRTSFDY	27	1									IGHV5_1F*F134	IGHD3-2*01	IGHJ4*01	AKDQTDLDWLLYGGFDY	17	5
		IGHV4_11*S4129	IGHD2-5*01	IGHJ4*01	ATDRRAGPLDY	11	2									IGHV4_11*S4664	IGHD6-1*01	IGHJ4*01	ARSPGIVAPFDY	12	10
									IGHV4_2M*F130	IGHD5-2*01	IGHJ5-1*01	AGDRGGYNYGFTDNWFDV	18	5									IGHV5_1H*F132	IGHD1-1*01	IGHJ6*01	AKERGWNNVDGLDS	14	6
		IGHV3_1E*F130	IGHD1-2*01	IGHJ5-1*01	AGTLAGTTSFDV	12	11									IGHV7_A*F132	IGHD4-1*01	IGHJ5-1*01	ARSRSGSNSESRFDV	15	5
		IGHV3_1E*F130	IGHD1-7*01	IGHJ5-1*01	AGGLGRTTSFDV	12	14		IGHV3_2C*F133	IGHD3-4*01	IGHJ4*01	TRGTAYYNFWSNSSPGYFDY	20	3									IGHV4_1M*F130	IGHD2-1*01	IGHJ4*01	ARHRRYSPFDY	11	4
																IGHV7_1A*F124	IGHD6-3*01	IGHJ2*01	ARPLYSGNWNVYWYFDL	17	4
		IGHV4_11*S3777	IGHD6-1*01	IGHJ4*01	ARVGSGWSTEGNFDY	15	4		IGHV3_4V*F133	IGHD3-2*01	IGHJ1*01	ARDKGSSYYQPESFEF	16	8									IGHV3_3A*F133	IGHD4-2*01	IGHJ4*01	ARDSSGVQFLDWLRIDY	17	3
		IGHV4_11*S3777	IGHD6-1*01	IGHJ4*01	ARVGSGWSTEGNFDY	15	2									IGHV4_11*S4290	IGHD6-1*01	IGHJ4*01	ARDGWGGWTIDY	12	3
									IGHV4_1N*F130	IGHD3-1*01	IGHJ4*01	ARRYYEDDYGYYYPGPNIAGTTRGVEE	27	6									IGHV1_1P*F133	IGHD3-2*01	IGHJ1*01	ATRGYYSGSYYDEYFEF	17	7
		IGHV3_2N*F134	IGHD4-2*01	IGHJ4*01	AKDWIQWLHLGSYFDF	16	6									IGHV4_11*S9724	IGHD4-1*01	IGHJ4*01	ARSGYGSGGTFDY	13	4
		IGHV3_2N*F134	IGHD4-2*01	IGHJ4*01	AKDWIQWVHLGSYFDY	16	3		IGHV4_1I*F130	IGHD6-2*01	IGHJ3*01	ARSTSSWPRTSDAFDF	16	1									IGHV5_1F*F134	IGHD6-3*01	IGHJ4*01	AKYGSGSWNVVGYFDY	16	0
																IGHV1_53*S2078	IGHD2-3*01	IGHJ4*01	ATTPGYCSSTYCRFDY	16	0
		IGHV4_11*S4664	IGHD4-1*01	IGHJ4*01	ARHSSTYVAPVDY	13	7																IGHV7_1A*F124	IGHD1-2*01	IGHJ3*01	ARTTSSWNNEAAFDF	15	2
																IGHV1_53*S2078	IGHD3-2*01	IGHJ1*01	ATKNYYDSGYHLSGEYFEF	19	4
		IGHV4_2C*F124	IGHD3-1*01	IGHJ4*01	ASAKGRLAPLDY	12	8																IGHV1_2G*F130	IGHD3-2*01	IGHJ4*01	ARGGGHYGSGYYFVGYFDY	19	4
																IGHV3_4I*F130	IGHD1-2*01	IGHJ5-1*01	AQCPEYSWNMGWFDV	15	2
		IGHV4_11*S5305	IGHD3-3*01	IGHJ4*01	ANWADYFDY	9	1																IGHV3_45*S1730	IGHD6-2*01	IGHJ5-1*01	STDLYLDWSRYNRFDV	16	2
																IGHV4_11*S3915	IGHD3-2*01	IGHJ5-1*01	ASPFYGSGYYTRRFDV	16	9
		IGHV4_2C*F124	IGHD3-4*01	IGHJ5-1*01	ARDPVITITTRERFDV	16	10																IGHV3_4I*F130	IGHD4-1*01	IGHJ4*01	AKESEILRAGFDY	13	2
																IGHV4_5B*F133	IGHD3-3*01	IGHJ5-1*01	ARDGYYSGDYYRHNWFAV	18	5
		IGHV4_11*S4129	IGHD6-1*01	IGHJ4*01	ARDQRTGPFDY	11	1																IGHV4_3M*F133	IGHD2-3*01	IGHJ5-2*02	AGGYLLFPLGYNSLDV	16	2
																IGHV4_11*S4290	IGHD2-1*01	IGHJ4*01	ARDCVDAFDY	10	0
		IGHV4_11*S4129	IGHD1-1*01	IGHJ6*01	ARQAFAGPTDS	11	6																IGHV3_3F*F132	IGHD2-4*01	IGHJ5-2*02	ARNLYSGSYYHGNSLDV	17	10
																IGHV1_53*S2078	IGHD1-3*01	IGHJ4*01	ATGYNWNDPFDY	12	2
		IGHV4_11*S0762	IGHD1-3*01	IGHJ5-2*02	ARRGPVNWNGSSLDV	15	4																IGHV4_3I*F132	IGHD6-1*01	IGHJ4*01	ARRFSGWYHVRLDY	14	4
																IGHV5_1E*F133	IGHD3-3*01	IGHJ5-1*01	TKVEGGYWGDYHRFDV	16	5
		IGHV3_1W*F134	IGHD1-1*01	IGHJ4*01	TRDRADSWNFHDYFDY	16	3																IGHV3_1T*F132	IGHD6-1*01	IGHJ5-2*02	KGSGWYEGYSLDV	13	2
		IGHV4_11*S5305	IGHD6-5*01	IGHJ4*01	AKIAVAGPVDY	11	4																IGHV5_1F*F134	IGHD4-4*01	IGHJ6*01	AKAVYSNYNGLDS	13	19
		IGHV4_2C*F124	IGHD2-3*01	IGHJ5-2*02	ATTYSGSDYYRLDV	14	6																IGHV5_1F*F134	IGHD1-2*01	IGHJ4*01	AKDRAPPSWNNEFDY	15	1
		IGHV1_2B*F134	IGHD3-3*01	IGHJ4*01	ARPDSLWGAAFDY	13	4																IGHV3_45*S4957	IGHD4-3*01	IGHJ4*01	ARDEDTVTTSDY	12	2
		IGHV4_11*S4664	IGHD6-2*01	IGHJ4*01	ARIGAAGPGDY	11	11																IGHV3_3O*F130	IGHD3-4*01	IGHJ5-1*01	TKEGGPEYYNIWTGWNRFDV	20	5
		IGHV4_11*S9724	IGHD3-3*01	IGHJ5-2*02	AKYWGDYYGYSSLDV	15	6																IGHV5_1F*F134	IGHD1-2*01	IGHJ3*01	AKGGGPPSWNDPFDF	15	17
		IGHV4_11*S4664	IGHD1-8*01	IGHJ4*01	ARVEVVGPTGY	11	9																IGHV5_1F*F134	IGHD5-3*01	IGHJ6*01	AKGGGYINYNGLDS	14	17
		IGHV4_3M*F133	IGHD2-4*01	IGHJ4*01	ARRYSGSYSPFDC	13	3																IGHV3_1T*F132	IGHD2-4*01	IGHJ4*01	TSGFLSGSFDY	11	2
		IGHV4_11*S6427	IGHD2-5*01	IGHJ4*01	AREGMGCTGSGCSISFDY	18	0																IGHV3_1T*F132	IGHD5-1*01	IGHJ4*01	TSGYSYSFFDY	11	7
		IGHV4_11*S9724	IGHD5-3*01	IGHJ4*01	ARQGYSGYSLFDY	13	7																IGHV3_1T*F132	IGHD3-3*01	IGHJ5-1*01	TSAPTGVIIPNRFDV	15	3
		IGHV4_11*S4664	IGHD6-2*01	IGHJ4*01	ASEIAGGPVDY	11	3																IGHV5_1F*F134	IGHD3-3*01	IGHJ4*01	AKNGPPYWGMGDY	13	5
		IGHV4_11*S5305	IGHD6-1*01	IGHJ5-1*01	ARDSSGWPWDNRFDV	15	4																IGHV7_1A*F124	IGHD6-1*01	IGHJ5-2*02	ATGRTGWDV	9	1
		IGHV4_11*S4129	IGHD2-3*01	IGHJ4*01	ARVTGRIAPFDY	12	4																IGHV3_4J*F132	IGHD6-3*01	IGHJ4*01	ARLRYGIAAAGTYFDY	16	18
		IGHV5_1A*F124	IGHD3-2*01	IGHJ6*01	ATNIWTGYSFYYGLDS	16	18																IGHV3_2P*F133	IGHD3-2*01	IGHJ5-1*01	VKDSWTWTGYFRFGRFDV	18	3
		IGHV4_11*S4129	IGHD3-1*01	IGHJ6*01	AREGRIHPLDS	11	31																IGHV4_3P*F133	IGHD4-2*01	IGHJ5-1*01	AGEKWVPFNRFDV	13	1
		IGHV3_4I*F130	IGHD4-1*01	IGHJ6*01	AKDHDYGGGLDS	12	3																IGHV3_3B*F132	IGHD3-3*01	IGHJ4*01	ARGIGWGDRYLDY	13	1
		IGHV3_4I*F130	IGHD6-3*01	IGHJ4*01	AKKSSGSWEVDY	12	5																IGHV7_1A*F124	IGHD6-3*01	IGHJ4*01	ATWRQLDY	8	7
		IGHV4_11*S5891	IGHD3-4*01	IGHJ5-1*01	ARHAYYNIWTGYSTNRFDV	19	0																IGHV5_1F*F134	IGHD3-2*01	IGHJ5-1*01	AKSNNIWTGYSDNRFDV	17	2
		IGHV5_1A*F124	IGHD6-3*01	IGHJ5-1*01	AEGSGSWNGRFGV	13	3																IGHV5_1F*F134	IGHD2-1*01	IGHJ4*01	AKSTLLPRSLDY	12	5
		IGHV1_53*S2078	IGHD3-2*01	IGHJ5-1*01	ATGRYYGGSYYGDRFDV	17	7																IGHV3_1S*F130	IGHD3-1*01	IGHJ5-2*02	TRAVSEDDYGYQNSLDV	17	8
		IGHV3_4I*F130	IGHD6-6*01	IGHJ4*01	AKCSSSSTGLDY	12	3																IGHV4_2H*F133	IGHD3-2*01	IGHJ4*01	ARLGENYNIWTGYLDY	16	3
		IGHV1_2B*F134	IGHD1-7*01	IGHJ4*01	ARDRSVTPFSWVEYYFDY	18	6																IGHV4_2L*F130	IGHD3-1*01	IGHJ4*01	ASDEDDYGAFDS	12	3
		IGHV4_5L*F134	IGHD6-2*01	IGHJ4*01	VRVVKYGPLDY	11	2																IGHV5_1F*F134	IGHD1-1*01	IGHJ5-1*01	AKGPPPWYSNRFDV	14	3
		IGHV4_11*S3915	IGHD3-2*01	IGHJ5-2*02	ARNPPYYNLWTGYYTHSLDV	20	2																IGHV3_1P*F130	IGHD6-1*01	IGHJ5-2*02	TRGGAAAGRGASLDV	15	5
		IGHV4_1F*F130	IGHD3-1*01	IGHJ4*01	ARVVKYGPLDY	11	1																IGHV3_1T*F132	IGHD6-3*01	IGHJ4*01	TSGFGIAAASLEY	13	8
		IGHV4_11*S3915	IGHD2-3*01	IGHJ4*01	AREGYCSYTYCSNLFEF	17	4																IGHV3_3F*F132	IGHD3-3*01	IGHJ6*01	ARGGLGLGYYGLDS	14	10
		IGHV4_2C*F124	IGHD6-1*01	IGHJ4*01	ARARIAAPFDY	11	6																IGHV3_45*S4957	IGHD3-4*01	IGHJ4*01	AREESLLQYLDWP	13	1
		IGHV4_11*S4664	IGHD1-8*01	IGHJ4*01	ARAGRMAATDY	11	5																IGHV4_3M*F133	IGHD3-2*01	IGHJ5-2*02	ARGLFNFWSGYWGHNSLDV	19	3
		IGHV4_11*S4129	IGHD1-8*01	IGHJ4*01	VRDVTLGPIDN	11	3																IGHV3_1T*F132	IGHD6-3*01	IGHJ4*01	TAAIAAASFDY	11	6
		IGHV4_11*S4129	IGHD4-4*01	IGHJ6*01	AREGRIQPLDS	11	4																IGHV3_3F*F132	IGHD3-4*01	IGHJ5-2*02	ARDWGLQYLDWATGQGGSLDV	21	12
		IGHV3_4I*F130	IGHD1-3*01	IGHJ4*01	AKCRNWNDFAY	11	4																IGHV1_1P*F133	IGHD3-2*01	IGHJ4*01	ARGGGHYGSGYYFVGYFDY	19	5
		IGHV4_2C*F124	IGHD6-1*01	IGHJ4*01	ARVHRGGPFDY	11	9																IGHV5_1F*F134	IGHD3-2*01	IGHJ5-2*02	AKHLGSGYYSWYNSLDV	17	0
		IGHV4_11*S4129	IGHD1-1*01	IGHJ4*01	ARGGRVHPMDY	11	6																IGHV4_1H*F133	IGHD4-4*01	IGHJ5-1*01	ARDQPYSNYGRFDV	14	4
		IGHV4_11*S4129	IGHD3-3*01	IGHJ4*01	ARGGPVSPFDY	11	9																IGHV3_1S*F130	IGHD3-1*01	IGHJ6*01	TXKLRLPPYGLDS	13	5
		IGHV4_11*S4664	IGHD4-2*01	IGHJ5-1*01	ARGQRVAPFDV	11	8																IGHV3_1P*F130	IGHD2-1*01	IGHJ4*01	TRSPPRHPSSDYFDY	15	8
		IGHV5_1A*F124	IGHD3-1*01	IGHJ5-1*01	AKETYEDDYGYYSLGYNRFDV	21	2																IGHV4_5G*F134	IGHD4-1*01	IGHJ4*01	ARLINYGPFDY	11	5
		IGHV5_1F*F134	IGHD1-7*01	IGHJ4*01	ASAWREHLPIDY	12	7																IGHV4_11*S9724	IGHD3-3*01	IGHJ4*01	ARHRGGGGDYHIDY	14	11
		IGHV3_1Z*F134	IGHD3-3*01	IGHJ6*01	ARDLYPGVINPSGLDS	16	4																IGHV3_2P*F133	IGHD6-2*01	IGHJ4*01	AKQYSSWSRAPFDY	14	2
																							IGHV3_3F*F132	IGHD3-2*01	IGHJ5-1*01	ARHGGVQYLDWLLYGHNRFDV	21	11
																							IGHV3_1T*F132	IGHD4-4*01	IGHJ4*01	TSGLKYSLFDY	11	0
																							IGHV5_1F*F134	IGHD6-1*01	IGHJ5-2*02	AKYSSGWYRDSLHV	14	0
																							IGHV3_45*S4957	IGHD4-4*01	IGHJ4*01	ARDSLTVTGLDY	12	5
																							IGHV3_3F*F132	IGHD3-2*01	IGHJ5-2*02	ARPEGHLDWLLYNSLDV	17	8
																							IGHV5_1F*F134	IGHD3-2*01	IGHJ6*01	AKDRRDIWTGYYNYGLDS	18	23
																							IGHV3_1T*F132	IGHD3-1*01	IGHJ4*01	TRGYEDDYGYYYTIFDY	17	3
																							IGHV3_1T*F132	IGHD2-2*01	IGHJ1*01	TSHCSRGVCYAAYFEF	16	2
																							IGHV5_1F*F134	IGHD4-1*01	IGHJ4*01	AKGWGYDYGSNPT	13	5
																							IGHV3_1I*F130	IGHD2-2*01	IGHJ4*01	AKSLVSTRLWD	11	5
																							IGHV1_1P*F133	IGHD3-1*01	IGHJ4*01	TSRGYYKDDYGYSSHFDY	18	10
																							IGHV3_1T*F132	IGHD1-8*01	IGHJ4*01	KGEGWELQRDLDY	13	4
																							IGHV5_1F*F134	IGHD4-1*01	IGHJ5-1*01	AKGVYGLTNRFDV	13	2
																							IGHV3_3F*F132	IGHD4-2*01	IGHJ5-2*02	ARDGGVQYLDWLGNSLDV	18	8
																							IGHV3_1I*F130	IGHD3-1*01	IGHJ4*01	AKGGEDDYIYYYTGADY	17	5
																							IGHV3_45*S4576	IGHD5-2*01	IGHJ4*01	TRVDIAGQFDY	11	4
																							IGHV3_1P*F130	IGHD3-2*01	IGHJ5-2*02	TRGGYNSGSYSSLDV	15	4
																							IGHV5_1F*F134	IGHD3-1*01	IGHJ4*01	AKDSAYYEDDYGYHIGDY	18	3
																							IGHV3_3F*F132	IGHD3-2*01	IGHJ4*01	ARGGYGSGYYTELDY	15	8
																							IGHV7_1A*F124	IGHD3-3*01	IGHJ6*01	TRGLHWGDYPLWYYGLDS	18	2
																							IGHV4_2L*F130	IGHD3-1*01	IGHJ3*01	ARPYDGDDAFDL	12	1
																							IGHV3_3F*F132	IGHD6-2*01	IGHJ5-1*01	ARDPLGSWSKNNRFDV	16	9
																							IGHV1_1P*F133	IGHD2-2*01	IGHJ4*01	ARGGGHSSFDF	11	7
																							IGHV3_1T*F132	IGHD6-1*01	IGHJ5-1*01	TSTSGWVNRFDV	12	5
																							IGHV5_1H*F132	IGHD6-5*01	IGHJ5-1*01	AKEDGGWSNNRVDV	14	1
																							IGHV3_3F*F132	IGHD3-2*01	IGHJ5-2*02	ARASSEVVITQRSYNSLDV	19	10
																							IGHV4_11*S9724	IGHD3-1*01	IGHJ4*01	ARHPPVYEDDYGSLDY	16	9
																							IGHV4_11*S4970	IGHD6-2*01	IGHJ5-2*02	ARDYSSWPTYNSLDV	15	14
																							IGHV3_3F*F132	IGHD6-2*01	IGHJ5-2*02	ARGGRGSSWSWSSLDV	16	10
																							IGHV1_2G*F130	IGHD4-2*01	IGHJ1*01	ASRGYSGYSEYFEF	14	1
																							IGHV5_1E*F133	IGHD6-5*01	IGHJ2*01	AKVPTYSGGWVQDWYFDL	18	2
																							IGHV3_1Z*F134	IGHD3-3*01	IGHJ4*01	AEYWGDYQIVDY	12	4
																							IGHV3_3F*F132	IGHD4-4*01	IGHJ6*01	AREFGLSVMRGYGLDS	16	37
																							IGHV3_1T*F132	IGHD6-1*01	IGHJ4*01	ISVPSPAAGTFGY	13	2
																							IGHV3_2P*F133	IGHD4-2*01	IGHJ5-2*02	AKGGNSGYSHGTLDV	15	11
																							IGHV3_1T*F132	IGHD1-2*01	IGHJ1*01	TSDPATYSWNEYFEF	15	1
																							IGHV1_1P*F133	IGHD6-6*01	IGHJ4*01	ARDKGYSSSFHIDF	14	4
